# Supplementary material for: Effect of Charcoal on the Properties, Enzyme Activities and Microbial Diversity of Temperate Pine Forest Soils
Source: MDPI journal article supplement (doi:10.3390/f12111488), 2021-10-29
Supplement: s1 [file s1]

Supplementary Table S1. Fungi isolated from the relict charcoal hearths (RCH) soil and control soil; National Center for Biotechnology Information (NCBI) accession numbers assigned to the sequences generated in this study.

| Taxon                                                  | Strain | Isolation source | GenBank accession no. |      |                  |
|--------------------------------------------------------|--------|------------------|-----------------------|------|------------------|
|                                                        |        |                  | ITS                   | TUB2 | TEF1- $\alpha$ . |
| <i>Absidia coerulea</i>                                | P1272  | Control soil     | OK584484              |      |                  |
| <i>Absidia cylindrospora</i> var. <i>cylindrospora</i> | P565   | RCH soil         | OK571344              |      |                  |
| <i>Ascocoryne</i> sp.                                  | P735   | RCH soil         | OK584485              |      |                  |
| <i>Aspergillus inflatus</i>                            | P687   | RCH soil         | OK584486              |      |                  |
|                                                        | P683   | RCH soil         | OK584487              |      |                  |
|                                                        | P724   | RCH soil         | OK584488              |      |                  |
| <i>Cladosporium</i> sp.                                | P725   | RCH soil         | OK584489              |      |                  |
| <i>Dermataceae</i>                                     | P680   | RCH soil         | OK584490              |      |                  |
| <i>Geomyces auratus</i>                                | P739   | RCH soil         | OK584491              |      |                  |
| <i>Helotiales</i> sp. 1                                | P721   | RCH soil         | OK584492              |      |                  |
|                                                        | P734   | Control soil     | OK584493              |      |                  |
|                                                        | P782   | RCH soil         | OK584494              |      |                  |
| <i>Helotiales</i> sp. 2                                | P765   | RCH soil         | OK584495              |      |                  |
| <i>Herpotrichiellaceae</i> sp.                         | P729   | RCH soil         | OK584496              |      |                  |
| <i>Humicolopsis cephalosporioides</i>                  | P717   | RCH soil         | OK584497              |      |                  |
|                                                        | P767   | Control soil     | OK584498              |      |                  |
|                                                        | P1277  | Control soil     | OK584499              |      |                  |
| <i>Hyaloscypha</i> sp.                                 | P745   | RCH soil         | OK584500              |      |                  |
| <i>Hyaloscyphaceae</i> sp.                             | P1281  | RCH soil         | OK584501              |      |                  |
| <i>Infundichalara</i> sp. 1                            | P696   | RCH soil         | OK584502              |      |                  |
|                                                        | P705   | RCH soil         | OK584503              |      |                  |
|                                                        | P733   | RCH soil         | OK584504              |      |                  |
|                                                        | P762   | RCH soil         | OK584505              |      |                  |
| <i>Infundichalara</i> sp. 2                            | P776   | RCH soil         | OK584506              |      |                  |
| <i>Infundichalara</i> sp. 3                            | P1267  | RCH soil         | OK584507              |      |                  |
| <i>Leptobacillium</i> sp.                              | P709   | RCH soil         | OK584508              |      |                  |
| <i>Metapochonia bulbilosa</i>                          | P543   | RCH soil         | OK584509              |      |                  |
|                                                        | P562   | RCH soil         | OK584510              |      |                  |
| <i>Microsphaeropsis olivacea</i>                       | P736   | RCH soil         | OK584511              |      |                  |
|                                                        | P719   | RCH soil         | OK584512              |      |                  |
| <i>Mortierella alliacea</i>                            | P553   | RCH soil         | OK584513              |      |                  |
|                                                        | P1284  | Control soil     | OK584514              |      |                  |
| <i>Mortierella alpina</i>                              | P556   | RCH soil         | OK584515              |      |                  |
| <i>Mortierella macrocystis</i>                         | P538   | RCH soil         | OK584516              |      |                  |
|                                                        | P539   | RCH soil         | OK584517              |      |                  |
|                                                        | P540   | RCH soil         | OK584518              |      |                  |
|                                                        | P545   | RCH soil         | OK584519              |      |                  |
|                                                        | P546   | RCH soil         | OK584520              |      |                  |
|                                                        | P557   | RCH soil         | OK584521              |      |                  |
|                                                        | P674   | RCH soil         | OK584522              |      |                  |
|                                                        | P679   | RCH soil         | OK584523              |      |                  |
|                                                        | P710   | RCH soil         | OK584524              |      |                  |
|                                                        | P1260  | RCH soil         | OK584525              |      |                  |
|                                                        | P1282  | RCH soil         | OK584526              |      |                  |
| <i>Mortierella parvispora</i>                          | P548   | RCH soil         | OK584527              |      |                  |
|                                                        | P563   | Control soil     | OK584528              |      |                  |
| <i>Mortierella sossauensis</i>                         | P559   | Control soil     | OK584529              |      |                  |
|                                                        | P550   | Control soil     | OK584530              |      |                  |
|                                                        | P554   | Control soil     | OK584531              |      |                  |
|                                                        | P555   | RCH soil         | OK584532              |      |                  |
|                                                        | P560   | RCH soil         | OK584533              |      |                  |
|                                                        | P564   | RCH soil         | OK584534              |      |                  |
|                                                        | P567   | RCH soil         | OK584535              |      |                  |
| <i>Mortierellaceae</i> sp.                             | P561   | RCH soil         | OK584536              |      |                  |
| <i>Mortierellales</i>                                  | P547   | Control soil     | OK584537              |      |                  |
| <i>Mucor hiemalis</i> f. <i>silvaticus</i>             | P1288  | Control soil     | OK584538              |      |                  |
| <i>Mucor moelleri</i>                                  | P1271  | Control soil     | OK584539              |      |                  |
| <i>Mucoromycetes</i>                                   | P566   | RCH soil         | OK584540              |      |                  |
| <i>Oberwinklerozyma</i> sp.                            | P691   | RCH soil         | OK584541              |      |                  |
| <i>Oidiodendron flavum</i>                             | P681   | RCH soil         | OK584542              |      |                  |
|                                                        | P784   | RCH soil         | OK584543              |      |                  |
| <i>Oidiodendron maius</i>                              | P786   | RCH soil         | OK584544              |      |                  |
| <i>Oidiodendron pilicola</i>                           | P764   | RCH soil         | OK584545              |      |                  |

|                                                          |       |              |          |          |
|----------------------------------------------------------|-------|--------------|----------|----------|
| <i>Oidiodendron rhodogenum</i>                           | P702  | RCH soil     | OK584546 |          |
| <i>Oidiodendron</i> sp. 1                                | P692  | RCH soil     | OK584547 |          |
|                                                          | P693  | RCH soil     | OK584548 |          |
|                                                          | P699  | RCH soil     | OK584549 |          |
|                                                          | P700  | RCH soil     | OK584550 |          |
|                                                          | P748  | RCH soil     | OK584551 |          |
|                                                          | P755  | RCH soil     | OK584552 |          |
|                                                          | P1263 | Control soil | OK584553 |          |
| <i>Oidiodendron</i> sp. 2                                | P697  | RCH soil     | OK584554 |          |
|                                                          | P737  | RCH soil     | OK584555 |          |
|                                                          | P1278 | RCH soil     | OK584556 |          |
|                                                          | P1259 | RCH soil     | OK584557 |          |
|                                                          | P1265 | RCH soil     | OK584558 |          |
| <i>Oidiodendron</i> sp. 3                                | P704  | RCH soil     | OK584559 |          |
|                                                          | P731  | RCH soil     | OK584560 |          |
|                                                          | P728  | RCH soil     | OK584561 |          |
|                                                          | P744  | RCH soil     | OK584562 |          |
|                                                          | P763  | RCH soil     | OK584563 |          |
|                                                          | P781  | RCH soil     | OK584564 |          |
|                                                          | P785  | RCH soil     | OK584565 |          |
| <i>Oidiodendron</i> sp. 4                                | P773  | RCH soil     | OK584566 |          |
| <i>Oidiodendron</i> sp. 5                                | P695  | RCH soil     | OK584567 |          |
| <i>Oidiodendron</i> sp. 6                                | P694  | RCH soil     | OK584568 |          |
|                                                          | P761  | RCH soil     | OK584569 |          |
|                                                          | P689  | RCH soil     | OK584570 |          |
|                                                          | P759  | RCH soil     | OK584571 |          |
|                                                          | P751  | RCH soil     | OK584572 |          |
|                                                          | P1273 | RCH soil     | OK584573 |          |
|                                                          | P1275 | Control soil | OK584574 |          |
|                                                          | P1276 | Control soil | OK584575 |          |
| <i>Oidiodendron</i> sp. 7                                | P768  | RCH soil     | OK584576 |          |
|                                                          | P774  | RCH soil     | OK584577 |          |
| <i>Oidiodendron</i> sp. 8                                | P754  | RCH soil     | OK584578 |          |
|                                                          | P775  | RCH soil     | OK584579 |          |
|                                                          | P703  | RCH soil     | OK584580 |          |
|                                                          | P757  | RCH soil     | OK584581 |          |
|                                                          | P1264 | RCH soil     | OK584582 |          |
| <i>Penicillium adametzii</i>                             | P1242 | Control soil | OK584583 | OK572513 |
|                                                          | P1243 | Control soil | OK584584 |          |
|                                                          | P1254 | RCH soil     | OK584585 |          |
| <i>Penicillium albidum</i>                               | P1270 | RCH soil     | OK584586 |          |
| <i>Penicillium cosmopolitanum</i>                        | P1248 | RCH soil     | OK584587 |          |
|                                                          | P1249 | RCH soil     | OK584588 | OK572514 |
| <i>Penicillium fuscum</i>                                | P1247 | RCH soil     | OK584589 | OK572515 |
| <i>Penicillium</i> sp. section <i>Thysanophora</i>       | P778  | RCH soil     | OK584590 | OK572516 |
|                                                          | P779  | RCH soil     | OK584591 |          |
| <i>Penicillium janczewskii</i>                           | P1245 | RCH soil     | OK584592 | OK572517 |
|                                                          | P1289 | Control soil | OK584593 | OK572518 |
| <i>Penicillium lividum</i>                               | P1293 | Control soil | OK584594 | OK572519 |
| <i>Penicillium melinii</i>                               | P1256 | RCH soil     | OK584595 |          |
| <i>Penicillium montanense</i>                            | P1244 | RCH soil     | OK584596 | OK572520 |
|                                                          | P1253 | RCH soil     | OK584597 |          |
|                                                          | P1292 | Control soil | OK584598 |          |
| <i>Penicillium subspinulosum</i>                         | P1250 | RCH soil     | OK584599 | OK572521 |
| <i>Penicillium thomii</i>                                | P1251 | RCH soil     | OK584600 | OK572522 |
| <i>Penicillium</i> sp. 1                                 | P1241 | Control soil | OK584601 | OK572523 |
| <i>Penicillium</i> sp. 2                                 | P1252 | RCH soil     | OK584602 | OK572524 |
|                                                          | P1255 | RCH soil     | OK584603 |          |
|                                                          | P1268 | RCH soil     | OK584604 |          |
| <i>Penicillium</i> sp. 3                                 | P1290 | Control soil | OK584605 |          |
| <i>Phialocephala</i> cf. <i>fortinii</i>                 | P718  | RCH soil     | OK584606 |          |
|                                                          | P726  | RCH soil     | OK584607 |          |
|                                                          | P738  | RCH soil     | OK584608 |          |
|                                                          | P746  | RCH soil     | OK584609 |          |
| <i>Pleuroascaceae</i> sp.                                | P727  | RCH soil     | OK584610 |          |
|                                                          | P760  | RCH soil     | OK584611 |          |
| <i>Pochonia cordycepsociata</i>                          | P678  | RCH soil     | OK584612 |          |
| <i>Pseudogymnoascus pannorum</i> var. <i>asperulatus</i> | P1286 | Control soil | OK584613 |          |
| <i>Pseudogymnoascus</i> sp.                              | P743  | RCH soil     | OK584614 |          |
| <i>Saccharomycetes</i> sp.                               | P771  | RCH soil     | OK584615 |          |

|                                    |       |              |          |          |
|------------------------------------|-------|--------------|----------|----------|
| <i>Sagenomella griseoviridis</i>   | P708  | RCH soil     | OK584616 |          |
|                                    | P750  | RCH soil     | OK584617 |          |
|                                    | P690  | RCH soil     | OK584618 |          |
|                                    | P741  | RCH soil     | OK584619 |          |
| <i>Sagenomella verticillata</i>    | P747  | Control soil | OK584620 |          |
|                                    | P770  | RCH soil     | OK584621 |          |
|                                    | P676  | RCH soil     | OK584622 |          |
|                                    | P682  | RCH soil     | OK584623 |          |
|                                    | P698  | RCH soil     | OK584624 |          |
|                                    | P701  | RCH soil     | OK584625 |          |
|                                    | P722  | RCH soil     | OK584626 |          |
|                                    | P730  | RCH soil     | OK584627 |          |
|                                    | P732  | RCH soil     | OK584628 |          |
|                                    | P749  | RCH soil     | OK584629 |          |
|                                    | P753  | RCH soil     | OK584630 |          |
|                                    | P780  | RCH soil     | OK584631 |          |
|                                    | P742  | RCH soil     | OK584632 |          |
|                                    | P756  | RCH soil     | OK584633 |          |
|                                    | P769  | RCH soil     | OK584634 |          |
|                                    | P706  | RCH soil     | OK584635 |          |
|                                    | P1274 | RCH soil     | OK584636 |          |
|                                    | P1291 | Control soil | OK584637 |          |
| <i>Saitozyma podzolica</i>         | P740  | Control soil | OK584638 |          |
| <i>Sarocladium strictum</i>        | P544  | Control soil | OK584639 |          |
| <i>Talaromyces kendrickii</i>      | P670  | Control soil | OK584640 |          |
| <i>Talaromyces proteolyticus</i>   | P671  | RCH soil     | OK584641 |          |
| <i>Tolypocladium album</i>         | P673  | RCH soil     | OK584642 |          |
|                                    | P684  | RCH soil     | OK584643 |          |
|                                    | P1283 | Control soil | OK584644 |          |
|                                    | P1285 | Control soil | OK584645 |          |
| <i>Tolypocladium geodes</i>        | P711  | Control soil | OK584646 |          |
| <i>Trichoderma parapiluliferum</i> | P723  | RCH soil     | OK584647 | OK556672 |
| <i>Trichoderma paraviridescens</i> | P579  | RCH soil     | OK584648 | OK556673 |
|                                    | P578  | RCH soil     | OK584649 | OK556674 |
|                                    | P1287 | Control soil | OK584650 |          |
| <i>Trichoderma polysporum</i>      | P716  | RCH soil     | OK584651 | OK556675 |
| <i>Trichoderma viride</i>          | P568  | RCH soil     | OK584652 | OK556676 |
|                                    | P569  | RCH soil     | OK584653 | OK556677 |
|                                    | P570  | RCH soil     | OK584654 |          |
|                                    | P571  | RCH soil     | OK584655 |          |
|                                    | P572  | RCH soil     | OK584656 |          |
|                                    | P573  | RCH soil     | OK584657 |          |
|                                    | P574  | RCH soil     | OK584658 |          |
|                                    | P575  | RCH soil     | OK584659 |          |
|                                    | P576  | RCH soil     | OK584660 |          |
|                                    | P580  | Control soil | OK584661 | OK556678 |
|                                    | P581  | RCH soil     | OK584662 |          |
|                                    | P582  | RCH soil     | OK584663 |          |
|                                    | P584  | RCH soil     | OK584664 |          |
| <i>Trichoderma</i> sp.             | P549  | RCH soil     | OK584665 |          |
|                                    | P583  | RCH soil     | OK584666 |          |
|                                    | P1258 | Control soil | OK584667 |          |
|                                    | P1261 | RCH soil     | OK584668 | OK556679 |
| <i>Umbelopsis changbaiensis</i>    | P552  | RCH soil     | OK584669 |          |
| <i>Umbelopsis isabellina</i>       | P541  | RCH soil     | OK584670 |          |
| <i>Umbelopsis nana</i>             | P542  | RCH soil     | OK584671 |          |
|                                    | P675  | RCH soil     | OK584672 |          |
| <i>Umbelopsis vinacea</i>          | P672  | RCH soil     | OK584673 |          |
|                                    | P677  | RCH soil     | OK584674 |          |
|                                    | P685  | RCH soil     | OK584675 |          |
|                                    | P686  | RCH soil     | OK584676 |          |
|                                    | P720  | RCH soil     | OK584677 |          |
|                                    | P551  | RCH soil     | OK584678 |          |

---

Supplementary Table S2. Frequencies (%) of culturable fungi from relict charcoal hearths (RCH) soil and control soil.

| Taxon                                                  | Relict charcoal hearths soils |      |      |      |      | Control soils |      |      |
|--------------------------------------------------------|-------------------------------|------|------|------|------|---------------|------|------|
|                                                        | RCH1                          | RCH2 | RCH3 | RCH4 | RCH5 | C1            | C2   | C3   |
| <i>Mucoromycota</i>                                    |                               |      |      |      |      |               |      |      |
| <i>Absidia coerulea</i>                                |                               |      |      |      |      | 2.9           | 0.3  |      |
| <i>Absidia cylindrospora</i> var. <i>cylindrospora</i> |                               |      |      | 1.6  |      |               |      |      |
| <i>Mortierella alliacea</i>                            |                               |      |      |      | 0.5  | 2.6           | 7.5  | 18.3 |
| <i>Mortierella alpina</i>                              |                               |      |      | 1.6  | 1.1  |               |      |      |
| <i>Mortierella macrocystis</i>                         | 3.7                           | 1.1  | 10.6 | 14.6 | 11.4 | 0.7           | 6.3  | 8.3  |
| <i>Mortierella parvispora</i>                          |                               |      |      |      |      | 1.8           |      |      |
| <i>Mortierella sossauensis</i>                         | 2.4                           | 1.7  | 6.5  | 0.8  | 4.3  | 17.6          | 2.6  | 4.0  |
| <i>Mortierellaceae</i> sp.                             |                               |      |      | 2.4  |      | 0.7           |      |      |
| <i>Mortierellales</i> sp.                              |                               |      |      | 0.8  |      | 0.4           |      |      |
| <i>Mucor hiemalis</i> f. <i>silvaticus</i>             |                               | 0.6  |      |      |      |               | 0.3  | 1.7  |
| <i>Mucor moelleri</i>                                  |                               |      |      |      |      | 0.4           |      |      |
| <i>Mucoromycetes</i>                                   |                               | 0.6  |      |      |      |               |      |      |
| <i>Umbelopsis isabellina</i>                           |                               | 11.3 |      |      |      |               | 0.6  | 0.3  |
| <i>Umbelopsis nana</i>                                 |                               | 0.6  |      | 1.6  |      | 1.5           | 5.5  | 5.0  |
| <i>Umbelopsis changbaiensis</i>                        |                               |      |      |      |      |               |      | 0.3  |
| <i>Umbelopsis vinacea</i>                              |                               |      |      | 20.3 |      | 0.4           |      |      |
| <i>Ascomycota</i>                                      |                               |      |      |      |      |               |      |      |
| <i>Ascocoryne</i> sp.                                  |                               | 0.6  |      |      |      |               |      |      |
| <i>Aspergillus inflatus</i>                            | 1.2                           |      | 1.6  | 4.1  | 10.8 |               |      |      |
| <i>Cladosporium</i> sp.                                |                               |      |      |      | 0.5  |               |      |      |
| <i>Dermateaceae</i> sp.                                |                               |      |      | 0.8  |      |               |      |      |
| <i>Geomyces auratus</i>                                |                               |      | 0.8  |      | 1.6  |               |      |      |
| <i>Helotiales</i> sp. 1                                |                               |      | 0.8  | 0.8  |      |               |      |      |
| <i>Helotiales</i> sp. 2                                | 0.6                           |      |      |      |      |               |      |      |
| <i>Herpotrichiellaceae</i> sp.                         |                               |      |      |      | 0.5  |               |      |      |
| <i>Humicolopsis cephalosporioides</i>                  | 1.2                           | 1.1  | 0.8  |      |      | 0.7           | 0.3  |      |
| <i>Hyaloscypha</i> sp.                                 |                               |      |      |      | 0.5  |               |      |      |
| <i>Hyaloscyphaceae</i> sp.                             |                               |      |      | 0.8  |      |               |      |      |
| <i>Infundichalara</i> sp. 1                            | 0.6                           | 4.0  |      | 0.8  | 0.5  |               |      |      |
| <i>Infundichalara</i> sp. 2                            |                               | 0.6  |      | 0.8  |      |               |      |      |
| <i>Infundichalara</i> sp. 3                            |                               |      |      |      | 1.1  |               |      |      |
| <i>Leptobacillum</i> sp.                               |                               |      |      |      | 1.6  |               |      |      |
| <i>Metapochonia bulbilosa</i>                          |                               | 1.1  |      |      | 0.5  |               |      |      |
| <i>Microsphaeropsis olivacea</i>                       |                               | 0.6  |      |      |      |               |      |      |
| <i>Oidiodendron flavum</i>                             |                               |      |      | 3.3  |      |               |      |      |
| <i>Oidiodendron maius</i>                              |                               |      |      |      | 0.5  |               |      |      |
| <i>Oidiodendron pilicola</i>                           | 0.6                           |      |      |      |      |               |      |      |
| <i>Oidiodendron rhodogenum</i>                         |                               |      | 1.6  |      |      |               |      |      |
| <i>Oidiodendron</i> sp. 1                              |                               | 1.1  | 0.8  | 0.8  |      |               |      |      |
| <i>Oidiodendron</i> sp. 2                              |                               | 1.1  | 16.3 |      |      |               |      |      |
| <i>Oidiodendron</i> sp. 3                              | 1.2                           |      | 0.8  | 2.4  |      |               |      |      |
| <i>Oidiodendron</i> sp. 4                              |                               |      | 0.8  |      |      |               |      |      |
| <i>Oidiodendron</i> sp. 5                              | 1.2                           | 1.1  | 1.6  | 3.3  |      |               |      |      |
| <i>Oidiodendron</i> sp. 6                              | 3.0                           | 4.0  |      | 21.6 |      | 2.6           |      |      |
| <i>Oidiodendron</i> sp. 7                              |                               | 0.6  | 0.8  | 0.8  |      |               |      |      |
| <i>Oidiodendron</i> sp. 8                              |                               |      | 2.4  | 2.4  |      |               |      |      |
| <i>Penicillium adametzii</i>                           |                               |      | 3.3  |      |      | 11.8          | 16.1 | 1.7  |
| <i>Penicillium albidum</i>                             |                               |      |      |      | 3.2  |               |      |      |
| <i>Penicillium cosmopolitanum</i>                      |                               | 0.6  |      |      | 3.8  | 0.4           |      |      |
| <i>Penicillium fuscum</i>                              |                               | 0.6  |      |      |      |               |      |      |
| <i>Penicillium janczewskii</i>                         | 57.3                          | 22.6 | 17.9 | 13.0 | 33.5 | 26.1          | 23.1 | 28.7 |
| <i>Penicillium lividum</i>                             |                               |      |      |      |      |               |      | 0.3  |
| <i>Penicillium melinii</i>                             |                               | 0.6  |      |      | 0.5  |               | 1.4  | 0.7  |
| <i>Penicillium montanense</i>                          | 0.6                           | 1.7  | 8.9  |      | 1.6  |               | 0.3  | 5.0  |
| <i>Penicillium subspinulosum</i>                       | 4.3                           | 10.2 | 3.3  |      | 2.7  | 4.0           | 9.2  | 1.3  |
| <i>Penicillium thomii</i>                              |                               | 1.1  |      |      |      |               |      |      |
| <i>Penicillium</i> sp. sect. <i>Thysanophora</i>       |                               | 1.1  |      |      |      |               |      |      |
| <i>Penicillium</i> sp. 1                               |                               |      |      |      |      | 0.4           |      |      |
| <i>Penicillium</i> sp. 2                               |                               | 10.2 |      | 0.8  | 4.3  |               |      |      |
| <i>Penicillium</i> sp. 3                               |                               |      |      |      |      |               | 5.5  |      |
| <i>Phialocephala</i> cf. <i>fortinii</i>               |                               | 0.6  | 0.8  |      |      |               |      |      |
| <i>Pleuroascaceae</i> sp.                              |                               |      | 0.8  |      |      |               |      |      |
| <i>Pochonia cordycepsociata</i>                        |                               |      |      | 0.8  |      |               |      |      |

|                                                          |      |     |     |      |     |      |      |      |
|----------------------------------------------------------|------|-----|-----|------|-----|------|------|------|
| <i>Pseudogymnoascus pannorum</i> var. <i>asperulatus</i> |      |     |     |      | 0.8 |      | 0.3  |      |
| <i>Pseudogymnoascus</i> sp.                              |      |     |     |      | 0.8 |      |      |      |
| <b><i>Saccharomycetes</i></b>                            |      | 1.1 |     |      |     |      |      |      |
| <b><i>Sagenomella griseoviridis</i></b>                  | 2.4  | 0.6 | 1.6 |      | 1.1 |      | 0.3  |      |
| <b><i>Sagenomella verticillata</i></b>                   | 3.7  | 4.0 | 4.9 | 3.3  |     |      |      |      |
| <i>Sarocladium strictum</i>                              | 0.6  |     |     |      |     |      |      |      |
| <i>Talaromyces kendrickii</i>                            |      |     |     |      |     |      |      | 0.3  |
| <i>Talaromyces proteolyticus</i>                         |      |     |     |      |     | 0.4  |      |      |
| <b><i>Tolypocladium album</i></b>                        | 1.2  | 4.5 | 2.4 | 0.8  | 8.1 | 8.5  | 11.0 | 11.0 |
| <i>Tolypocladium geodes</i>                              | 2.4  |     |     |      | 0.5 |      |      | 1.7  |
| <i>Trichoderma parapiluliferum</i>                       |      |     |     |      | 0.5 |      |      |      |
| <i>Trichoderma paraviridescens</i>                       |      | 5.1 |     |      |     |      |      | 1.3  |
| <i>Trichoderma polysporum</i>                            |      |     |     |      |     |      | 0.3  |      |
| <b><i>Trichoderma viride</i>*</b>                        | 11.6 | 4.0 | 6.5 | 11.4 | 5.4 | 14.7 | 5.2  | 6.3  |
| <b><i>Trichoderma</i> sp.</b>                            |      |     |     | 1.6  |     | 0.4  | 4.0  | 3.7  |
| Basidiomycota                                            |      |     |     |      |     |      |      |      |
| <i>Oberwinklerozyma</i> sp.                              |      |     |     |      |     | 1.1  |      |      |
| <b><i>Saitozyma podzolica</i></b>                        |      |     | 3.3 |      | 0.5 |      |      |      |
| Number of CFU                                            | 164  | 177 | 123 | 123  | 185 | 272  | 347  | 300  |
| Number of taxa                                           | 19   | 33  | 25  | 30   | 27  | 22   | 20   | 19   |

Species detected also in NGS analysis are marked in bold type, the combined number of reads in all samples subjected to NGS analysis is given in brackets.

\* OTU identified as *Trichoderma* sp.

Supplementary Table S3. Frequencies (%) of culturable fungal genera from relict charcoal hearths (RCH) soil and control soil \*

| Genus                   | Relict charcoal hearths soil |      |      |      |      | Control soil |      |      |
|-------------------------|------------------------------|------|------|------|------|--------------|------|------|
|                         | RCH1                         | RCH2 | RCH3 | RCH4 | RCH5 | C1           | C2   | C3   |
| <i>Absidia</i>          |                              |      |      | 1,6  |      | 2,9          | 0,3  |      |
| <i>Aspergillus</i>      | 1,2                          |      | 1,6  | 4,1  | 10,8 |              |      |      |
| <i>Geomyces</i>         |                              |      | 0,8  |      | 1,6  |              |      |      |
| <i>Humicolopsis</i>     | 1,2                          | 1,1  | 0,8  |      |      | 0,7          | 0,3  |      |
| <i>Infundichalara</i>   | 0,6                          | 4,5  |      | 1,6  | 1,6  |              |      |      |
| <i>Leptobacillium</i>   |                              |      |      |      | 1,6  |              |      |      |
| <i>Metapochonia</i>     |                              | 1,1  |      |      | 0,5  |              |      |      |
| <i>Mortierella</i>      | 6,1                          | 2,8  | 17,1 | 17,1 | 17,3 | 22,8         | 16,4 | 30,7 |
| <i>Mucor</i>            |                              | 0,6  |      |      |      | 0,4          | 0,3  | 1,7  |
| <i>Oberwinklerozyma</i> |                              |      |      |      |      | 1,1          |      |      |
| <i>Oidiodendron</i>     | 6,1                          | 7,9  | 25,2 | 14,6 | 0,5  | 2,6          |      |      |
| <i>Penicillium</i>      | 62,2                         | 48,6 | 33,3 | 13,8 | 48,1 | 42,6         | 55,6 | 37,7 |
| <i>Pseudogymnoascus</i> |                              |      |      | 1,6  |      |              | 0,3  |      |
| <i>Sagenomella</i>      | 6,1                          | 4,5  | 6,5  | 3,3  | 1,1  |              | 0,3  |      |
| <i>Saitozyma</i>        |                              |      | 3,3  |      | 0,5  |              |      |      |
| <i>Tolypocladium</i>    | 3,7                          | 4,5  | 2,4  | 0,8  | 8,6  | 8,5          | 11,0 | 12,7 |
| <i>Trichoderma</i>      | 11,6                         | 9,0  | 6,5  | 13,0 | 5,9  | 15,1         | 9,5  | 11,3 |
| <i>Umbelopsis</i>       |                              | 11,9 |      | 22,0 |      | 1,8          | 6,1  | 5,7  |

\* genera that occurred only as a single CFU were omitted
